# Supplementary material for: Minimally Invasive Retrofitting of RC Joints with Externally Applied SMA Plate—Adaptive Design Optimisation through Probabilistic Damage Simulation
Source: MDPI journal article supplement (doi:10.3390/su15043831), 2023-02-20
Supplement: s1 [file s1]

---

**Supplementary material to the paper:**

**Minimally invasive retrofitting of RC joints with  
externally applied SMA plate - adaptive design  
optimisation through probabilistic damage simulation**

Mohammad Amin Molod, Franz-Joseph Barthold, and Panagiotis Spyridis

Sustainability, MDPI, 2023

## 1. Model input data – Constitutive material laws

| Parameter type | Parameter subtype             | Parameter     | Property                                                                              | Range                      | Unit            | Value    |
|----------------|-------------------------------|---------------|---------------------------------------------------------------------------------------|----------------------------|-----------------|----------|
| Elasticity     | -                             | $E$           | Young modulus                                                                         | -                          | GPa             | 36.57    |
|                | -                             | $\nu$         | Poissons' ratio                                                                       | -                          | -               | 0.2      |
| Plasticity     | Drucker-Prager yield function | $f_{uc}$      | Uniaxial compressive strength                                                         | $f_{uc} \geq f_{ut}$       | MPa             | 53.5     |
|                |                               | $f_{bc}$      | Biaxial compressive strength                                                          | $f_{bc} \geq f_{uc}$       | MPa             | 61.525   |
|                |                               | $f_{ut}$      | Uniaxial tensile strength                                                             | $f_{ut} \geq 0$            | MPa             | 3.5      |
|                | Compression cap               | $\sigma^C_v$  | Intersection point abscissa between compression cap and Drucker-Prager yield function | $\sigma^C_v \geq f_{uc}/3$ | MPa             | -60      |
|                |                               | $R$           | Ratio between the major and minor axes of the cap                                     | $R \geq 0$                 | -               | 2        |
|                | Hardening                     | $D$           | Hardening material constant                                                           | $D \geq 0$                 | MPa             | 5.50E+04 |
|                |                               | $R_T$         | Tension cap hardening                                                                 | $R_T \geq 0$               | -               | 4        |
| Damage         | -                             | $\gamma_{t0}$ | Tension damage threshold                                                              | $\gamma_{t0} \geq 0$       | -               | 0        |
|                | -                             | $\gamma_{c0}$ | Compression damage threshold                                                          | $\gamma_{c0} \geq 0$       | -               | 2.00E-06 |
|                | -                             | $\beta_t$     | Tension damage evolution constant                                                     | $\beta_t \geq 0$           | -               | 7.00E+03 |
|                | -                             | $\beta_c$     | Compression damage evolution constant                                                 | $\beta_c \geq 0$           | -               | 5.00E+03 |
| Nonlocal       | -                             | $c$           | Nonlocal interaction range parameter                                                  | $c \geq 0$                 | mm <sup>2</sup> | 2550     |
|                | -                             | $m$           | Over-nonlocal averaging parameter                                                     | $m \geq 0$                 | -               | 2.5      |

Table 1. Required parameters to define coupled damage-plasticity microplane model

| Parameter type     | Parameter    | Property                                                                       | Range                          | Unit | Value |
|--------------------|--------------|--------------------------------------------------------------------------------|--------------------------------|------|-------|
| Elasticity         | $E$          | Young modulus                                                                  | -                              | GPa  | 36.57 |
|                    | $\nu$        | Poissons' ratio                                                                | -                              | -    | 0.2   |
| Material constants | $\beta_t$    | Shear transfer coefficients for an open crack                                  | $I \geq \beta_t \geq 0$        | -    | 0.3   |
|                    | $\beta_c$    | Shear transfer coefficients for a closed crack                                 | $I \geq \beta_c \geq 0$        | -    | 0.7   |
|                    | $f_t$        | Uniaxial tensile cracking stress                                               | $f_t \geq 0$                   | MPa  | 3.5   |
|                    | $f_c$        | Uniaxial crushing stress (positive)                                            | $f_c \geq f_t$                 | MPa  | 53.5  |
|                    | $f_{cb}$     | Biaxial crushing stress (positive)                                             | $f_{cb} (=1.2 f_c) \geq f_c$   | MPa  | 0     |
|                    | $\sigma^a_h$ | Ambient hydrostatic stress state                                               | $\sqrt{3} f_c \geq \sigma^a_h$ | MPa  | 0     |
|                    | $f_1$        | Biaxial crushing stress (positive) under the ambient hydrostatic stress state  | $f_1 (=1.45 f_c) \geq f_{cb}$  | MPa  | 0     |
|                    | $f_2$        | Uniaxial crushing stress (positive) under the ambient hydrostatic stress state | $f_2 (=1.725 f_c) \geq f_1$    | MPa  | 0     |
|                    | $T_c$        | Stiffness multiplier for cracked tensile condition                             | $I \geq T_c \geq 0$            | -    | 0.6   |

Table 2. Required parameters to define Menetrey-William constitutive model

| Parameter type     | Parameter        | Property                             | Range                               | Unit | Value    |
|--------------------|------------------|--------------------------------------|-------------------------------------|------|----------|
| Elasticity         | $E$              | Young modulus                        | -                                   | GPa  | 36.57    |
|                    | $\nu$            | Poissons' ratio                      | -                                   | -    | 0.2      |
| Material constants | $k_0$            | Damage function constant 1           | -                                   | -    | 0.779    |
|                    | $k_1$            | Damage function constant 2           | -                                   | -    | 0.779    |
|                    | $k_2$            | Damage function constant 3           | -                                   | -    | 0.136    |
|                    | $\gamma^{mic}_0$ | Critical equivalent strain           | -                                   | -    | 4.18E-05 |
|                    | $\alpha^{mic}$   | Maximum damage parameter             | -                                   | -    | 0.1      |
|                    | $\beta^{mic}$    | Scale for rate of damage             | $I \geq \beta^{mic} \geq 0$         | -    | 2.00E+04 |
|                    | $c$              | Nonlocal interaction range parameter | $\sqrt{c}/2 \geq \text{Elem. Size}$ | -    | 2550     |

Table 3. Required parameters to define elastic microplane material model

## 2. Model input data – Element types

(adopted from Ansys Mechanical APDL Documentation 2019 by ANSYS Inc.)

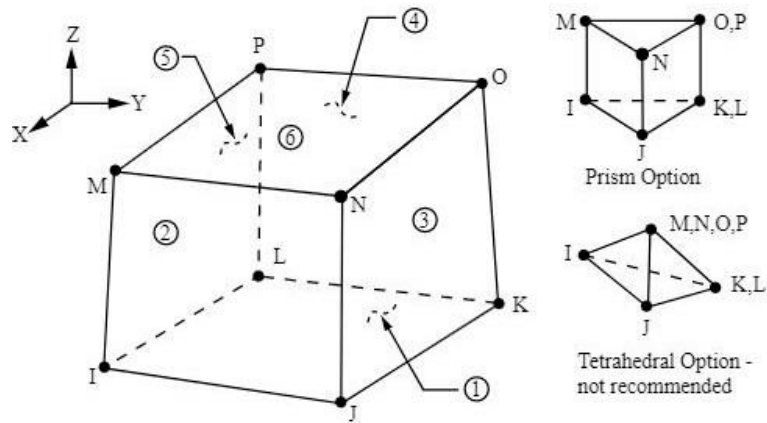

Fig 1. Solid element CPT 215

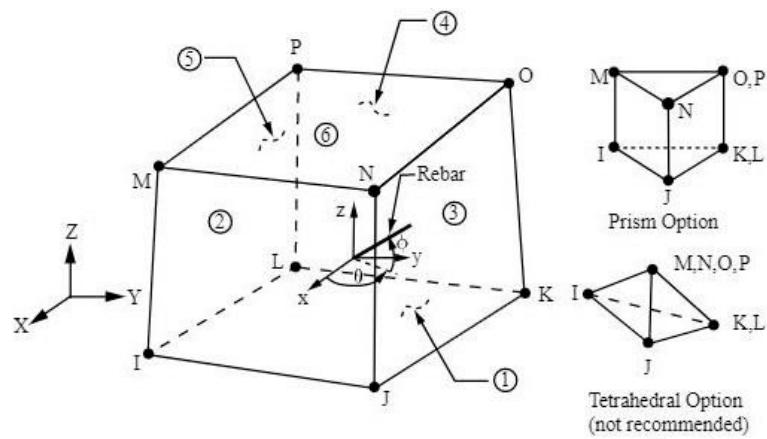

Fig 2. Solid element 65

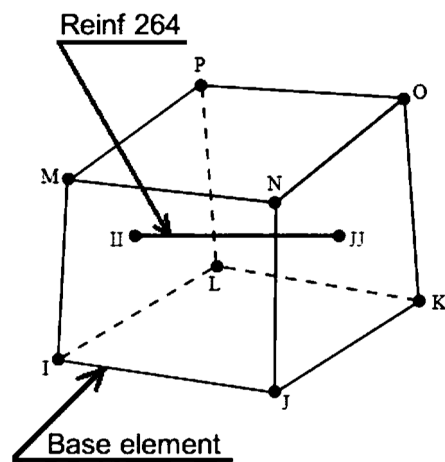

Fig 3. Reinf264

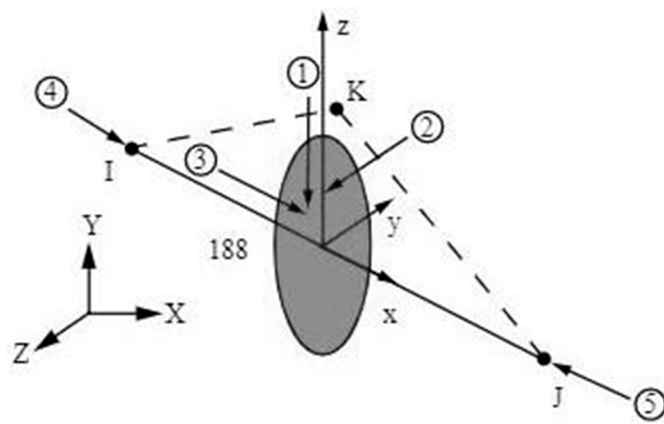

Fig 4. Beam 188

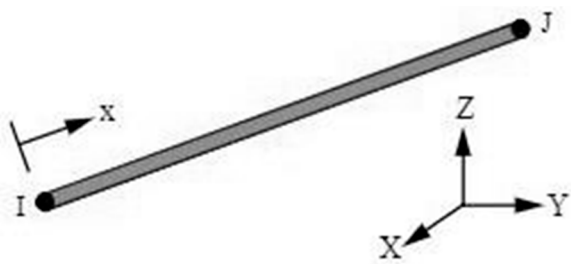

Fig 5. Link180

### 3. Load-displacement curves from experiment and models with different elements combinations

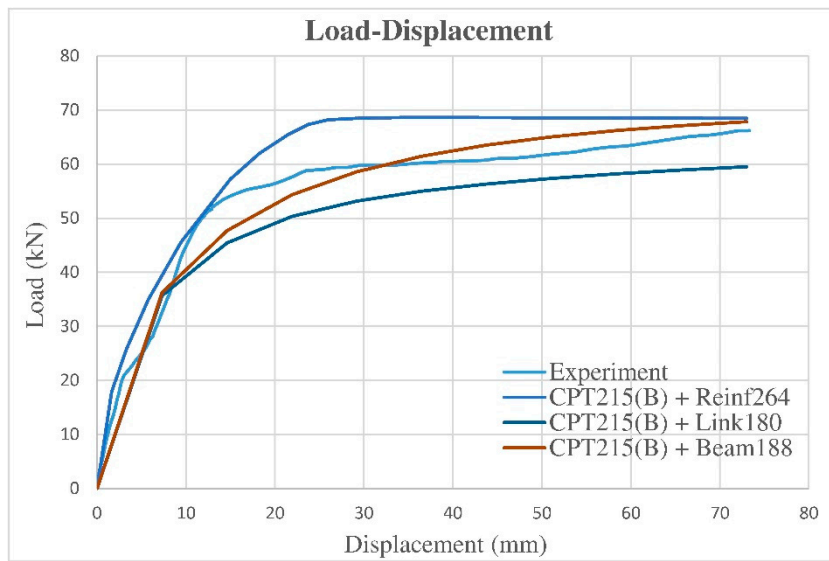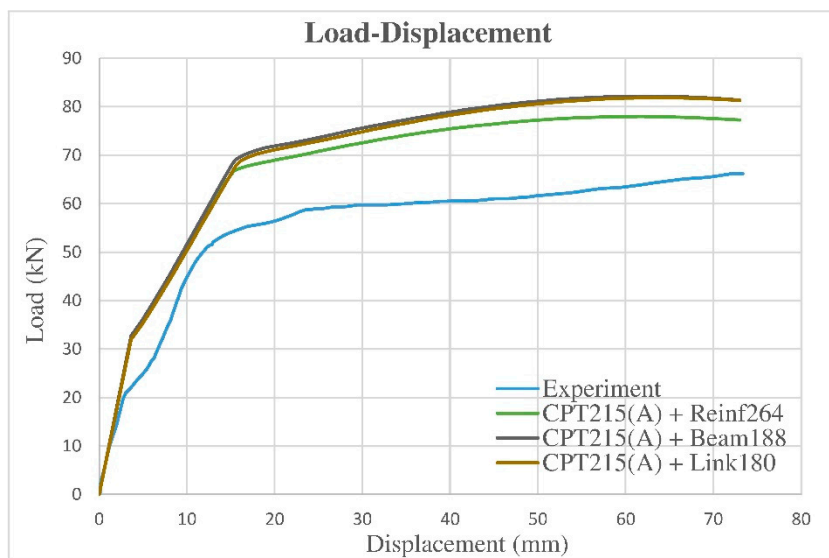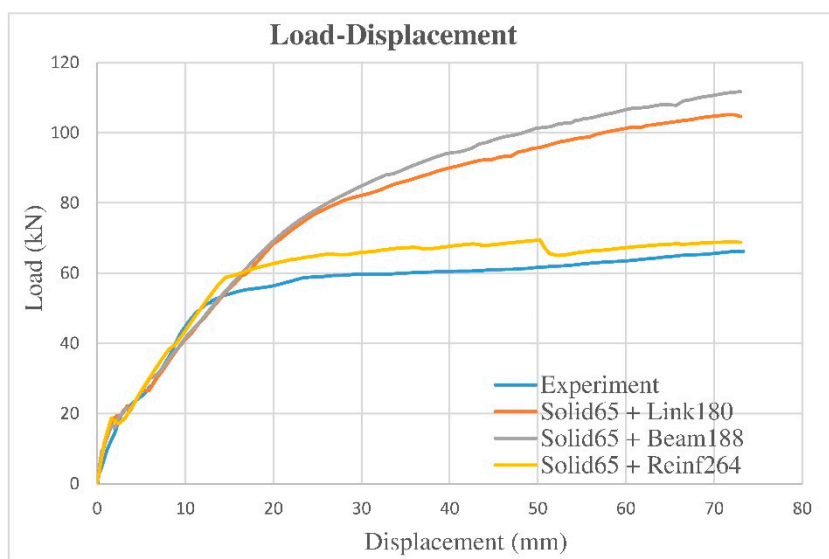

#### 4. Algorithm flow chart

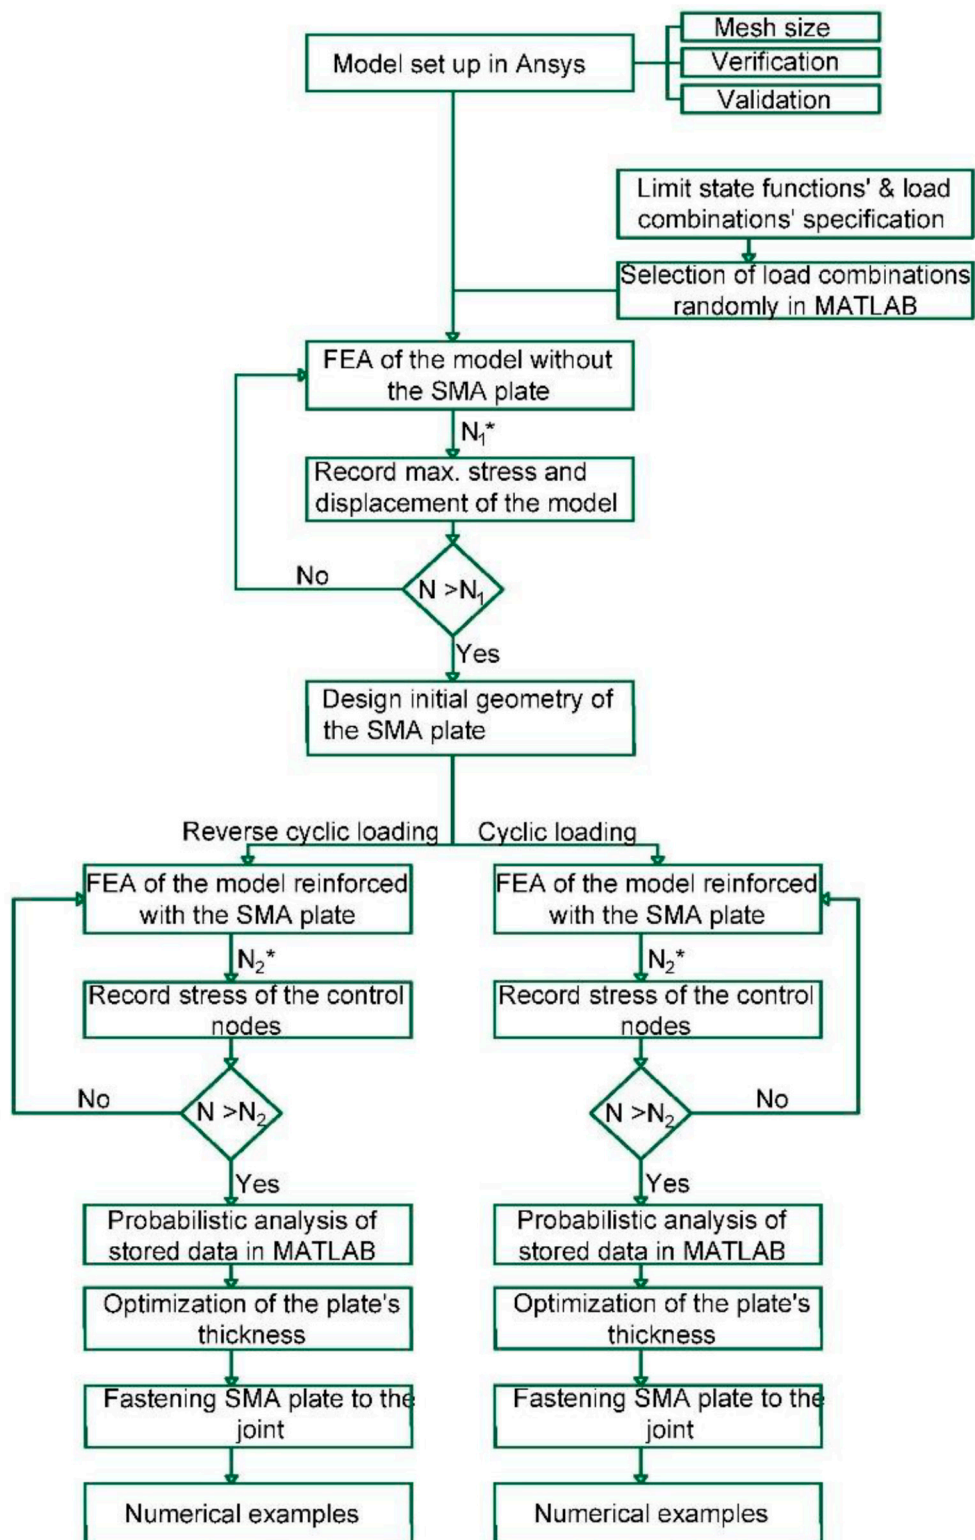

## 5. Table of symbols and notations

|                        |                                                                                          |
|------------------------|------------------------------------------------------------------------------------------|
| $E$                    | Young modulus                                                                            |
| $\nu$                  | Poissons' ratio                                                                          |
| $\rho$                 | Density                                                                                  |
| $f_{uc}$               | Uniaxial compressive strength                                                            |
| $f_{bc}$               | Biaxial compressive strength                                                             |
| $f_{ut}$               | Uniaxial tensile strength                                                                |
| $\sigma^{C_V}$         | Intersection point abscissa between compression cap and Drucker-Prager yield function    |
| $R$                    | Ratio between the major and minor axes of the cap                                        |
| $D$                    | Hardening material constant                                                              |
| $R_T$                  | Tension cap hardening                                                                    |
| $Y_{t0}$               | Tension damage threshold                                                                 |
| $Y_{c0}$               | Compression damage threshold                                                             |
| $\beta_t$              | Tension damage evolution constant                                                        |
| $\beta_c$              | Compression damage evolution constant                                                    |
| $c$                    | Nonlocal interaction range parameter                                                     |
| $m$                    | Over-nonlocal averaging parameter                                                        |
| $k_0$                  | Damage function constant 1                                                               |
| $k_1$                  | Damage function constant 2                                                               |
| $k_2$                  | Damage function constant 3                                                               |
| $Y^{\text{mic}}_0$     | Critical equivalent strain                                                               |
| $\alpha^{\text{mic}}$  | Maximum damage parameter                                                                 |
| $\beta^{\text{mic}}$   | Scale for rate of damage                                                                 |
| $c$                    | Nonlocal interaction range parameter                                                     |
| $\beta_t$              | Shear transfer coefficients for an open crack                                            |
| $\beta_c$              | Shear transfer coefficients for a closed crack                                           |
| $f_t$                  | Uniaxial tensile cracking stress                                                         |
| $f_c$                  | Uniaxial crushing stress (positive)                                                      |
| $f_{cb}$               | Biaxial crushing stress (positive)                                                       |
| $\sigma^{\text{ah}}$   | Ambient hydrostatic stress state                                                         |
| $f_1$                  | Biaxial crushing stress (positive) under the ambient hydrostatic stress state            |
| $f_2$                  | Uniaxial crushing stress (positive) under the ambient hydrostatic stress state           |
| $T_c$                  | Stiffness multiplier for cracked tensile condition                                       |
| $\sigma_s^{\text{AS}}$ | Starting stress value for the forward phase transformation                               |
| $\sigma_f^{\text{AS}}$ | Final stress value for the forward phase transformation                                  |
| $\sigma_s^{\text{SA}}$ | Starting stress value for the reverse phase transformation                               |
| $\sigma_f^{\text{SA}}$ | Final stress value for the reverse phase transformation                                  |
| $\epsilon_L$           | Maximum residual strain                                                                  |
| $\alpha$               | Parameter measuring the difference between material responses in tension and compression |

|                    |                                                                           |
|--------------------|---------------------------------------------------------------------------|
| $\sigma_y$         | Yield stress                                                              |
| $\sigma_u$         | Ultimate stress                                                           |
| $\varepsilon_{su}$ | Ultimate strain of steel                                                  |
| $\varepsilon_{cu}$ | Ultimate strain of concrete                                               |
| $\varepsilon_s$    | Strain of steel                                                           |
| $\varepsilon_c$    | Strain of concrete                                                        |
| $\xi$              | Factor defining the effective height of the compression zone              |
| $x$                | distance of the neutral axis from the extreme compression fiber           |
| $d$                | Distance between top surface of a beam and middle of bottom reinforcement |
| $a$                | Distance between top surface of a beam and middle of top reinforcement    |
| $z$                | Depth of beam                                                             |
| $b$                | Width of beam cross-section                                               |
| $\alpha_R$         | Factor defining the effective strength of concrete                        |
| $F_{cd}$           | Compressive carrying load capacity of concrete                            |
| $F_{sd}$           | Compressive carrying load capacity of steel                               |
| $\sigma_{cd}$      | Design stress of concrete                                                 |
| $\sigma_{sd}$      | Design stress of steel                                                    |
| $A_{s1}$           | Area of top steel reinforcement (compression rebar)                       |
| $A_{s2}$           | Area of bottom steel reinforcement (tensile rebar)                        |
| $F_{ud}$           | Ultimate design load                                                      |
| $K_a$              | Coefficient                                                               |
| $M_{Rd}$           | Moment capacity of the section                                            |
| $R_1$              | Axial column force                                                        |
| $R_2$              | Bending moment force                                                      |
| $R_3$              | Axial beam force                                                          |
| $D_b$              | Steel bar diameter                                                        |
| $L_p$              | Length of plastic hinge region                                            |
